# Supplementary material
Source: PubMed Central journal article supplement (PMC4787954)
Supplement: perj771568.ww1_default.pdf [file perj771568.ww1_default.pdf]

**Appendix 1:** Validation of classification performance of the rules using bootstrap (1000 replications) [posted as supplied by author]

|       | <b>Observed sensitivity<br/>(95% CI)</b> | <b>Observed specificity<br/>(95% CI)</b> | <b>Bootstrap sensitivity<br/>(95% CI)</b> | <b>Bootstrap specificity<br/>(95% CI)</b> |
|-------|------------------------------------------|------------------------------------------|-------------------------------------------|-------------------------------------------|
| Rule1 | 1.000 (0.964 to 1.000)                   | 0.284 (0.263 to 0.305)                   | 1.000 (1.000 to 1.000)                    | 0.284 (0.283 to 0.284)                    |
| Rule2 | 1.000 (0.964 to 1.000)                   | 0.365 (0.344 to 0.388)                   | 1.000 (1.000 to 1.000)                    | 0.365 (0.364 to 0.366)                    |
| Rule3 | 1.000 (0.964 to 1.000)                   | 0.387 (0.365 to 0.410)                   | 1.000 (1.000 to 1.000)                    | 0.387 (0.386 to 0.388)                    |
